# Supplementary material for: The influence of reaction media on CdIn2S4 and ZnIn2S4 nanocrystallite formation and growth of mesocrystal structures
Source: Royal Society of Chemistry journal article supplement (doi:10.1039/c5ce01432h), 2015-01-01
Supplement: c5ce01432h1.pdf [file c5ce01432h1.pdf]

## Supporting information

### The influence of the reaction media on $\text{CdIn}_2\text{S}_4$ and $\text{ZnIn}_2\text{S}_4$ nanocrystalite formation and growth of mesocrystal structures

M. V. Carević,<sup>a</sup> M. I. Čomor,<sup>a\*</sup> M. N. Mitrić,<sup>a</sup> T. S. Barudžija,<sup>a</sup> S. P. Ahrenkiel,<sup>b</sup> and Nadica D. Abazović<sup>a\*</sup>

| Sample | Concentrations of ions precursor solutions (mol/dm <sup>3</sup> ) |        |     |
|--------|-------------------------------------------------------------------|--------|-----|
|        | Cd                                                                | In     | S   |
| C1     | 0.0485                                                            | 0.0914 | 0.2 |
| C2     | 0.0333                                                            | 0.1    | 0.2 |
| C3     | 0.0333                                                            | 0.1    | 0.2 |
| Z1     | 0.5                                                               | 0.1    | 0.2 |

Table S1. Molarities of precursor solutions

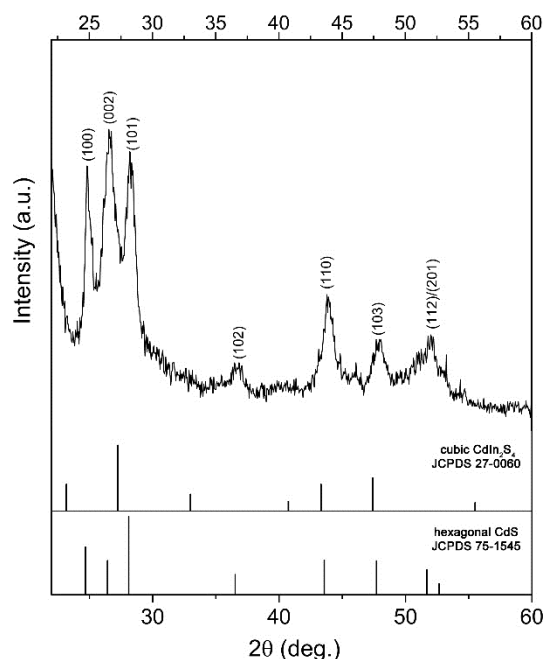

**Fig. S1** XRD pattern of sample C1 with corresponding JCPDS cards and relative intensities of related diffraction peaks

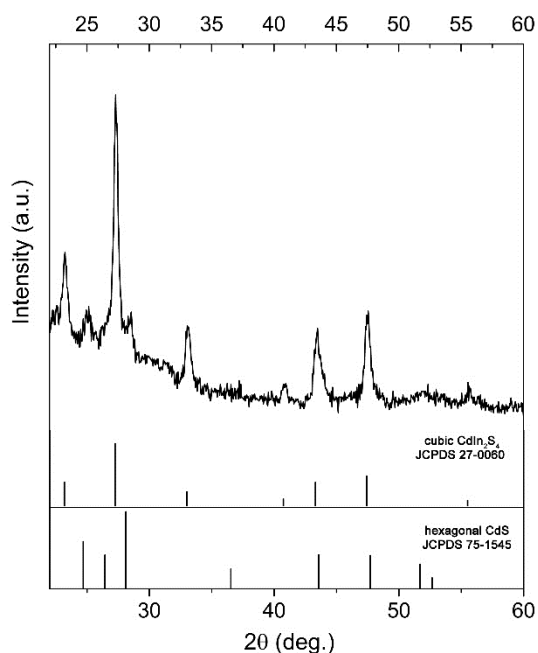

**Fig. S2** XRD pattern of sample C2 with corresponding JCPDS cards and relative intensities of related diffraction peaks

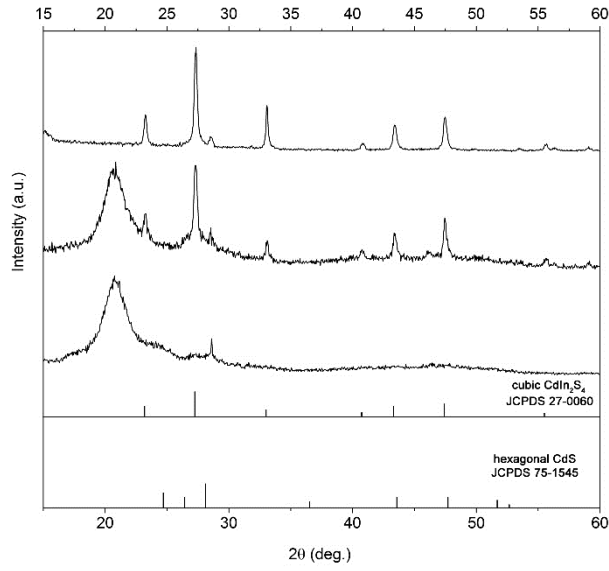

**Fig. S3** XRD pattern of sample C3 with corresponding JCPDS cards and relative intensities of related diffraction peaks

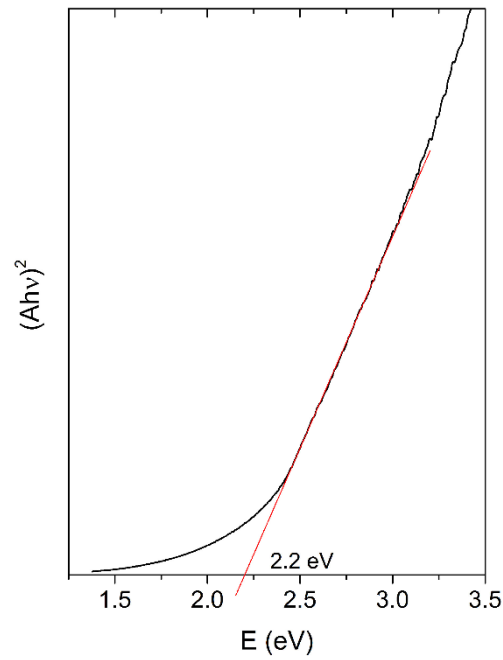

**Fig. S4** Tauc plot of sample C2, with estimated value of band-gap energy

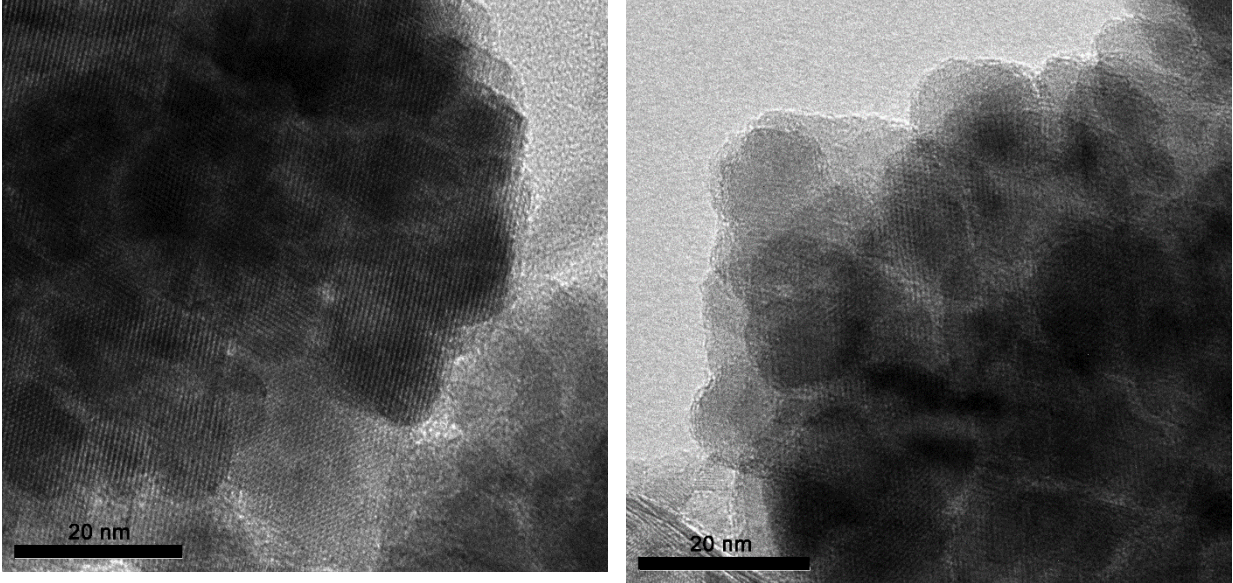

**Fig. S5** TEM images of sample C3 capped with oleic acid/oleylamine dispersed in toluene

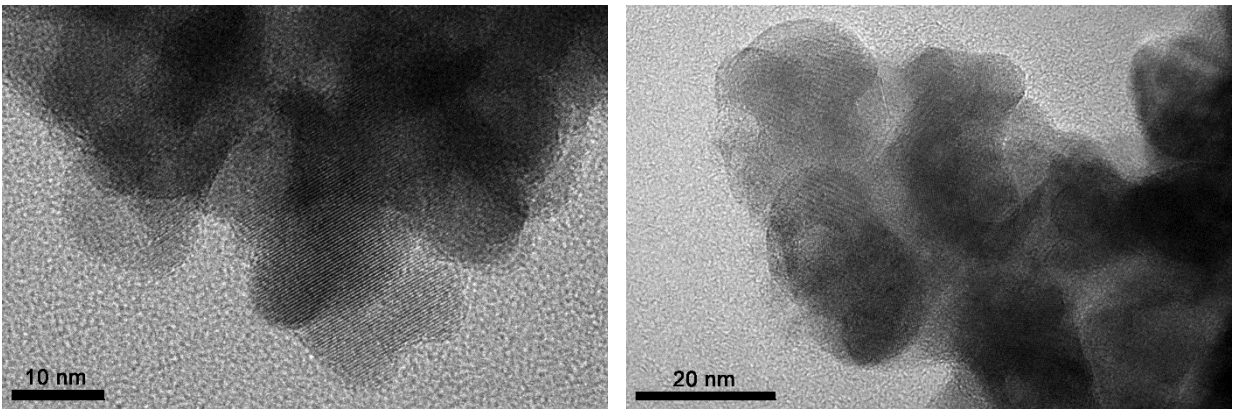

**Fig. S6** TEM images of sample C3 capped with 2-mercaptoethanol dispersed in water

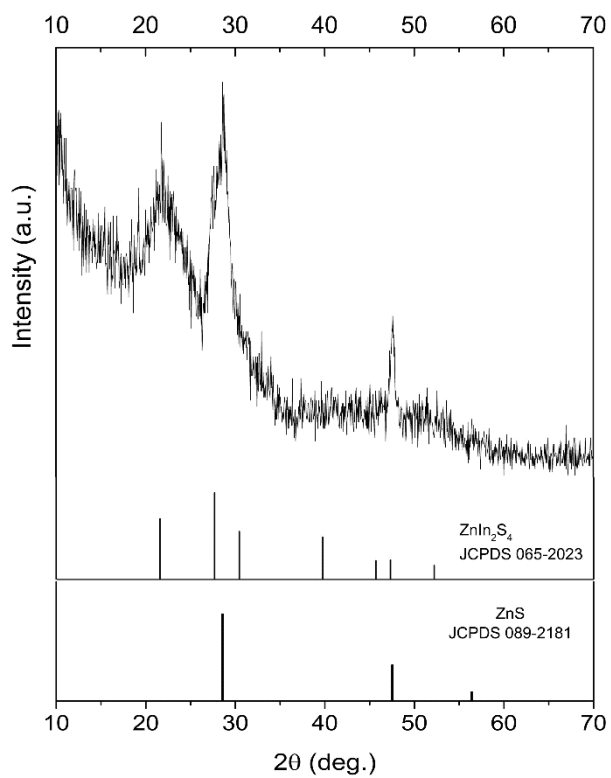

**Fig. S7** XRD pattern of sample Z1 with corresponding JCPDS cards and relative intensities of related diffraction peaks
